# Supplementary material for: A novel SMC-like protein, SbcE (YhaN), is involved in DNA double-strand break repair and competence in Bacillus subtilis
Source: PubMed Central journal article supplement — Nucleic Acids Res. 2009 Nov 11;38(2):455–66. doi: 10.1093/nar/gkp909 (PMC2811018; doi:10.1093/nar/gkp909), 2009-11-11
Supplement: gkp909_1.pdf [file gkp909_1.pdf]

## Supplementary material

Suppl. FigureS 1

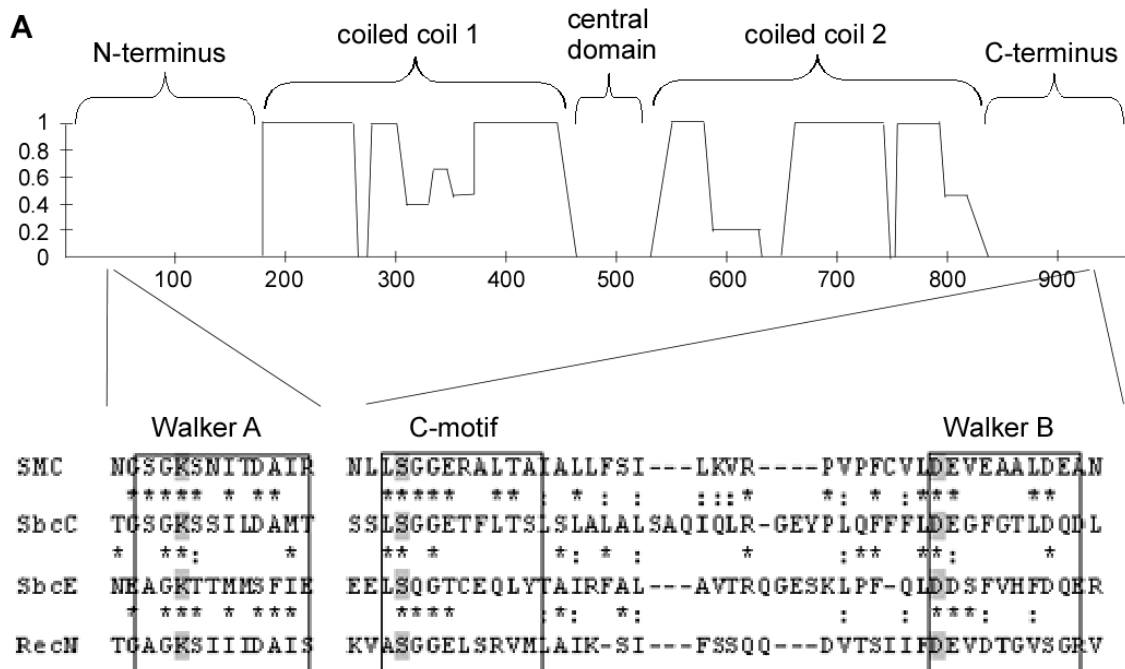

## B

**central domain:**

**470**

**GMLFIVLFLSLQQWIPAI SFGAALIVYWLVS GKSSSRNSRETRQPM TDISPAEAEMLRREAL**

**++ SL P + + V +++ S ++ + + + E +**

Fig. 1 A) Structure of SbcE according to sequence analysis. Coiled coil prediction shows the two extended heptad repeat regions that are separated by a central domain of unknown function. Sequence alignment (stars indicate identical residues between SMC and the other 3 SMC-like proteins from *B. subtilis*, colon indicates similar residues) indicating Walker A motif in the N-terminus and Walker B motif and the C-motif (boxed) within the C-terminus. Grey shaded residues have been shown to be essential for ATP binding and/or hydrolysis in SMC proteins. B) Sequence of the central (non-coiled coil) domain, conserved positions are indicated by "+" and highly conserved residues by the corresponding letter. The invariant proline is written in bold.
